# Supplementary material
Source: MDPI journal article supplement (https://www.mdpi.com/2624-781X/4/3/32)
Supplement: s1 [file s1]

# Co-Hydroprocessing of Fossil Middle Distillate and Bio-Derived Durene-Rich Heavy Ends under Hydrotreating Conditions

David Graf<sup>1</sup>, Johannes Waßmuth<sup>1</sup> and Reinhard Rauch<sup>1</sup>

<sup>1</sup> Karlsruhe Institute of Technology (KIT), Engler-Bunte-Institute, Division of Fuel Technology (EBI-ceb), Engler-Bunte-Ring 1a, 76131 Karlsruhe, Germany

## Supplementary Materials

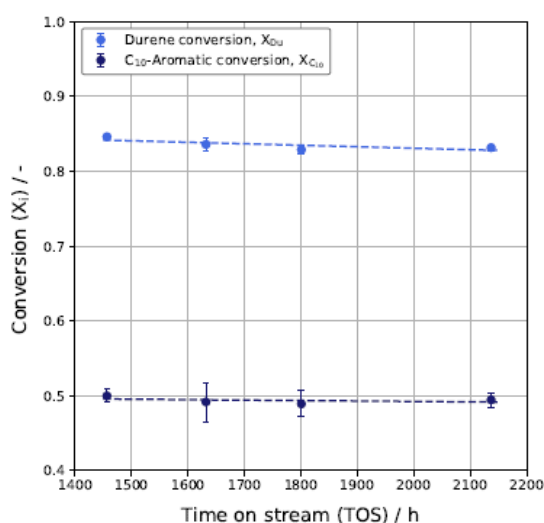

**Figure S1.** Durene and  $C_{10}$  aromatics conversion at a reference point for the co-HP of 15 wt.% durene and 85 wt.% MD. Experimental conditions:  $T = 380\text{ }^{\circ}\text{C}$ ,  $LHSV = 0.25\text{ h}^{-1}$ ,  $p_{H_2} = 59\text{ bar}$ ,  $p_{Ar} = 3.9\text{ bar}$  and  $V_{H_2}/V_{Feed} = 1042\text{ Nm}^3\text{ m}^{-3}$ .

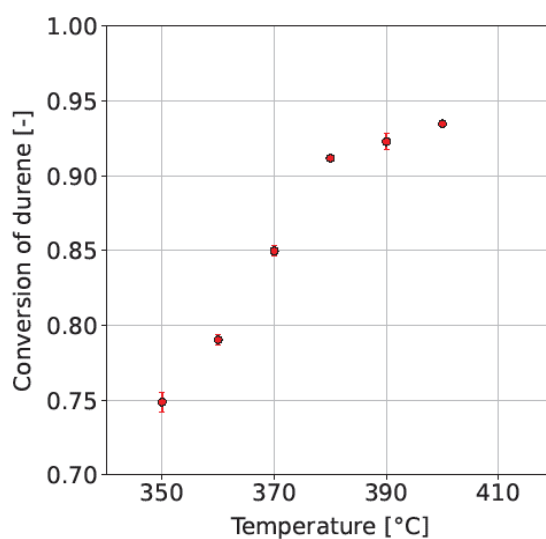

**Figure S2.** Duren conversion under variation of temperature for the co-HP of 15 wt.% durene and 85 wt.% MD. Experimental conditions:  $LHSV = 0.4\text{ h}^{-1}$ ,  $p_{H_2} = 59\text{ bar}$ ,  $p_{Ar} = 3.9\text{ bar}$  and  $V_{H_2}/V_{Feed} = 1042\text{ Nm}^3\text{ m}^{-3}$ .

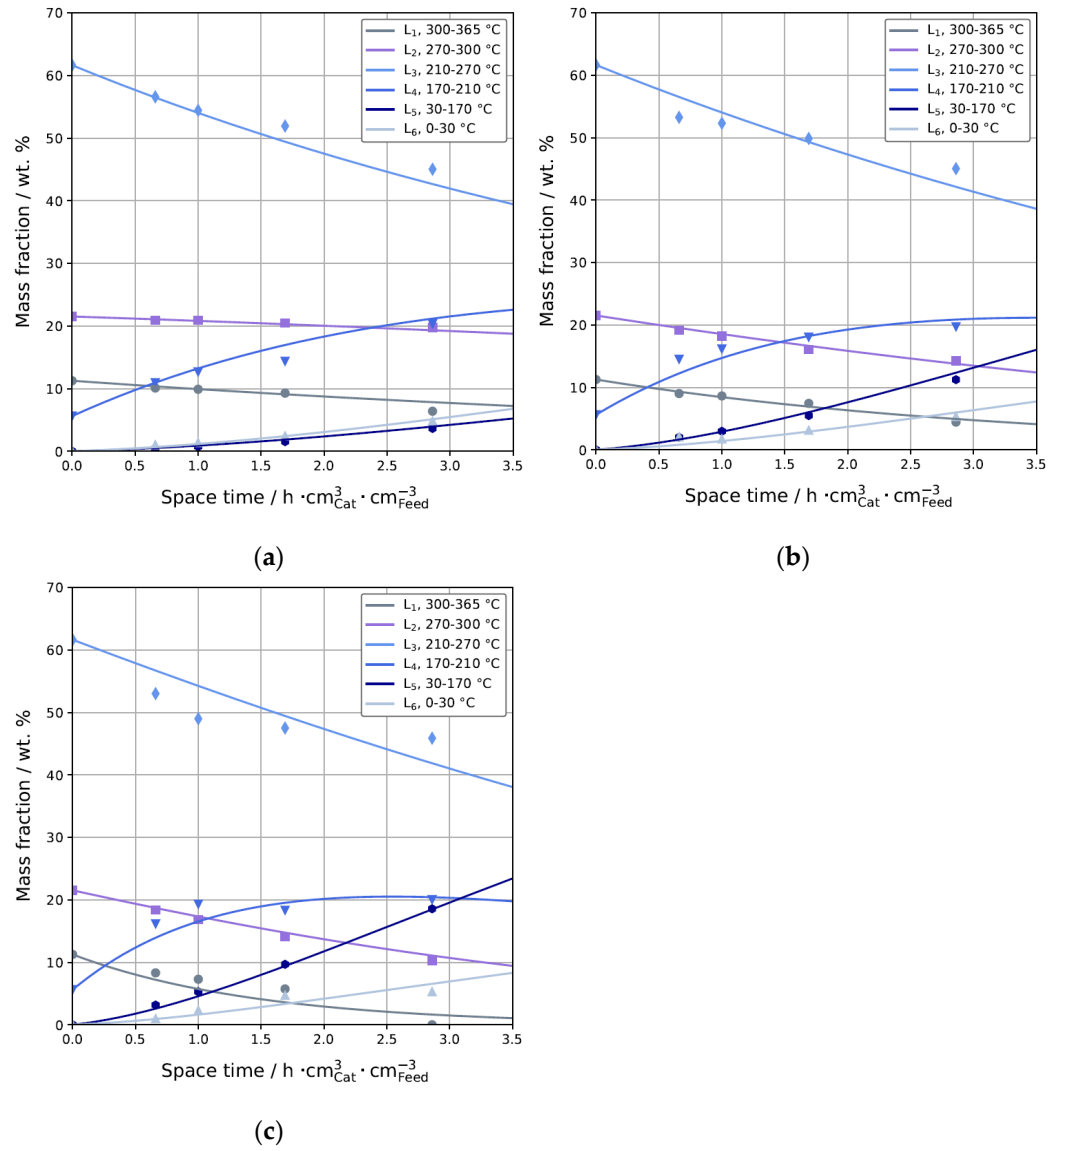

**Figure S3.** Fitting results for the reduced model at (a) 350 °C, (b) 380 °C, and (c) 390 °C for the co-HP of 15 wt.% durene and 85 wt.% MD. Experimental conditions:  $\bar{p}_{H_2}$ = 59 bar,  $\bar{p}_{Ar}$ = 3.9 bar and  $\dot{V}_{H_2}/\dot{V}_{Feed}$ =1042 Nm<sup>3</sup> m<sup>-3</sup>.

Note: Measuring point of Lump 1 in Figure S3c for a space time of 2.86 h cm<sup>3</sup><sub>Cat</sub> cm<sup>-3</sup><sub>Cat</sub> is probably too low due to measurement uncertainties in distillation.

**Table S1.** Experimental data (weight fractions) at 340 °C, 350 °C, 370 °C, 380 °C and 390 °C for the co-HP of 15 wt.% durene and 85 wt.% MD. Experimental conditions:  $\bar{p}_{H_2}$ = 59 bar,  $\bar{p}_{Ar}$ = 3.9 bar and  $\dot{V}_{H_2}/\dot{V}_{Feed}$ =1042 Nm<sup>3</sup> m<sup>-3</sup>.

| T [°C] | Lump | Space time [h <sup>-1</sup> ] |       |       |       |       |
|--------|------|-------------------------------|-------|-------|-------|-------|
|        |      | 0                             | 0.833 | 1.333 | 2.000 | 4.000 |
| 340    | 6    | 0.00                          | 1.01  | 2.39  | 3.12  | 4.00  |
|        | 5    | 0.00                          | 0.49  | 0.88  | 1.30  | 2.92  |
|        | 4    | 5.61                          | 11.46 | 12.33 | 19.70 | 21.31 |
|        | 3    | 61.64                         | 55.58 | 53.71 | 46.07 | 42.22 |
|        | 2    | 21.51                         | 21.12 | 20.23 | 21.44 | 20.59 |
|        | 1    | 11.25                         | 10.33 | 10.46 | 8.36  | 8.97  |
| T [°C] | Lump | Space time [h <sup>-1</sup> ] |       |       |       |       |
|        |      | 0.000                         | 0.666 | 1.000 | 1.690 | 2.860 |
| 350    | 6    | 0.00                          | 1.04  | 1.39  | 2.44  | 4.84  |
|        | 5    | 0.00                          | 0.43  | 0.73  | 1.53  | 3.63  |
|        | 4    | 5.61                          | 10.94 | 12.67 | 14.37 | 20.35 |
|        | 3    | 61.64                         | 56.58 | 54.41 | 51.92 | 45.02 |
|        | 2    | 21.51                         | 20.92 | 20.90 | 20.48 | 19.77 |
|        | 1    | 11.25                         | 10.09 | 9.89  | 9.27  | 6.39  |
| 370    | 6    | 0.00                          | 1.66  | 1.55  | 2.19  | 3.64  |
|        | 5    | 0.00                          | 1.13  | 1.91  | 3.29  | 7.92  |
|        | 4    | 5.61                          | 13.16 | 14.54 | 17.05 | 20.85 |
|        | 3    | 61.64                         | 54.27 | 52.84 | 50.81 | 43.54 |
|        | 2    | 21.51                         | 20.00 | 19.77 | 18.15 | 17.70 |
|        | 1    | 11.25                         | 9.78  | 9.39  | 8.50  | 6.36  |
| 380    | 6    | 0.00                          | 2.08  | 1.73  | 3.14  | 5.35  |
|        | 5    | 0.00                          | 2.00  | 2.97  | 5.48  | 11.24 |
|        | 4    | 5.61                          | 14.50 | 16.15 | 18.04 | 19.70 |
|        | 3    | 61.64                         | 53.25 | 52.30 | 49.86 | 45.04 |
|        | 2    | 21.51                         | 19.15 | 18.23 | 16.06 | 14.25 |
|        | 1    | 11.25                         | 9.01  | 8.62  | 7.43  | 4.44  |
| 390    | 6    | 0.00                          | 0.99  | 2.32  | 4.70  | 5.29  |
|        | 5    | 0.00                          | 3.16  | 5.29  | 9.67  | 18.56 |
|        | 4    | 5.61                          | 16.15 | 19.30 | 18.32 | 20.03 |
|        | 3    | 61.64                         | 53.00 | 48.98 | 47.50 | 45.87 |
|        | 2    | 21.51                         | 18.40 | 16.82 | 14.07 | 10.25 |
|        | 1    | 11.25                         | 8.31  | 7.29  | 5.74  | 0.00  |
